# Supplementary material for: Commentary: “I’ve lost count of the times my door has been broken by the police”
Source: HighWire-hosted journal article supplement (doi:10.1136/bmj.j1165), 2017-03-15
Supplement: bmj.j1165.pdf [file bmj.j1165.pdf]

## 评论：“我已经记不清警察破门而入我家多少次了”

Commentary: “I've lost count of the times my door has been broken by the police”

来源:BMJ 2017;356:j1165 doi: 10.1136/bmj.j1165

我的手机响了,但是没有来电显示,但我知道是谁打来的。是长途线路,很难听清楚,警察正将无线电设备作为手机打电话。

“你在哪里? 我们需要来看你。这是出于对您健康的考虑。”

我相信我的家庭医生。我花了很长时间才能这样说。我知道在某些时候,当她担心我的精神状态时,她没有什么可选择的。找到正确的方法来帮助解决我的不良精神状况并不容易。我属于那种对任何精神专科提供的服务都不适应的人——我有时让自己置身于不止一种的危险情况——结果就是,我的家庭医生就是我的精神科治疗团队、我的危机管理团队。除了意外或者紧急情况,这就是我的全部。

“我们在你的房子外面,如果你不告诉我们你在哪里,我们就破门而入了。”

这并不是一个空头威胁。我已经不记得我的家被警察破门而入多少次了。如果在家我会应门,但当我情况不好的时候,我经常不在家。我很害怕。因为上一次警察破门而入,当我出院后,我遭到了邻居的报复性攻击;他们不喜欢警方总注意自己所在的地区,希望我离开这里。我生活的社区将警察与犯罪行为、破坏行为联系在一起,一些人他们不希望警察出现在这里。他们并不知道我从来没有犯过罪,但他们看到警察,就希望我离开这里。

“你的家庭医生告诉我们你并不安全,我们只需要和你谈谈,不会将您送去医院的。”

警察已经成为处理像我这种出现精神危机情况个体的首个应对者。所以我之前也有过类似经历,我知道最后一句话是假的。警察是被我的家庭医生,或者社

工,或者是一位关心我的朋友叫来的,他们认为他们的职责就是依据精神卫生法的条例将我带去医院。这就是我害怕告诉他们我在哪里原因。我此前已经被关进精神病院许多次了,我对精神病院感到很恐惧,尽管在途中警察一直试图对我表现得很和蔼。

一旦警察在我住的地方见到我之后,就会给我带上手铐或者关进警车的笼子里把我送去医院。被拷着走过急诊室,即使我病着,我也知道人们在看我、议论我。将精神疾病“罪犯化”,并不仅仅发生在医院没有地方而把我放进牢房时,它无所不在。

我和我的家庭医生关系不错,但在危机事件之后这很难重新建立了。我知道她叫警察的唯一原因是她认为我不安全,但是安全对于我来说,包括精神安全还有躯体安全。上一次出院的时候,我发现警察用一把挂锁把我家被砸破的门从外面锁上了。这样我没办法从家里头锁上门了,这种情况大概持续了几个月,直到我的状态好转,恢复到能够找人来修理。

我希望在危机情况下,我的家庭医生能有别的选择,而不是直接叫警察来看我是不是安全。我知道她尝试向精神科急诊转介,或者联系居家治疗团队,但是他们并不接受家庭医生的转介。所以我们停滞不前,我很害怕会变得不好,不仅仅是因为我的疾病,还因为人们尝试去帮助时所做的举动。

利益竞争 (Competing interests): I have read and understood BMJ policy on declaration of interests and have no relevant interests to declare.

来源及同行评议 (Provenance and peer review): Commissioned; not externally peer reviewed.

黄 昀 译  
马 宁 校  
北京大学精神  
卫生研究所

BMJ takes no responsibility for the accuracy of the translation from the published English language original and is not liable for any errors that may occur.

**BMJ**
